# Supplementary material for: Adolescents, Young Adults, and Adults Continue to Use E-Cigarette Devices and Flavors Two Years after FDA Discretionary Enforcement
Source: MDPI journal article supplement (doi:10.3390/ijerph19148747), 2022-07-18
Supplement: s1 [file s1]

**Table S1.** E-cigarette flavor types used by age category (Ever, Past 30 Days, Most used in Past 30 Days), no. (%).

|                                  | Ever Use<br>(N = 3137) |                    |                    | Past 30 Days<br>(N = 2256) |                    |                    | Most used in the Past 30 Days<br>(N = 2256) |                    |                    |
|----------------------------------|------------------------|--------------------|--------------------|----------------------------|--------------------|--------------------|---------------------------------------------|--------------------|--------------------|
|                                  | 13-20<br>(N = 1,614)   | 21-24<br>(N = 696) | 25-40<br>(N = 827) | 13-20<br>(N = 1,092)       | 21-24<br>(N = 546) | 25-40<br>(N = 618) | 13-20<br>(N = 1,092)                        | 21-24<br>(N = 546) | 25-40<br>(N = 618) |
| Sweet/dessert/candy <sup>a</sup> | 829 (51.4)             | 374 (53.7)         | 421 (50.9)         | 461 (42.2)                 | 259 (47.4)         | 277 (44.8)         | 269 (24.6)                                  | 155 (28.4)         | 179 (29.0)         |
| Sweets or dessert<br>flavors     | 645 (40.0)             | 301 (43.2)         | 312 (37.7)         | 338 (31.0)                 | 200 (36.6)         | 209 (33.8)         | 195 (17.9)                                  | 116 (21.2)         | 136 (22.0)         |
| Candy                            | 466 (28.9)             | 190 (27.3)         | 226 (27.3)         | 225 (20.6)                 | 117 (21.4)         | 137 (22.2)         | 101 (9.2)                                   | 52 (9.5)           | 72 (11.7)          |
| Fruit                            | <b>953 (59.0)</b>      | <b>402 (57.8)</b>  | 365 (44.1)         | <b>550 (50.4)</b>          | <b>278 (50.9)</b>  | 250 (40.5)         | <b>436 (39.9)</b>                           | <b>212 (38.8)</b>  | 200 (32.4)         |
| Mint/menthol <sup>b</sup>        | 887 (55.0)             | 372 (53.4)         | 410 (49.6)         | 489 (44.8)                 | 259 (47.4)         | <b>299 (48.4)</b>  | 323 (29.6)                                  | 165 (30.2)         | <b>202 (32.7)</b>  |
| Mint                             | 520 (32.2)             | 167 (24.0)         | 178 (21.5)         | 230 (21.1)                 | 97 (17.8)          | 117 (18.9)         | 118 (10.8)                                  | 40 (7.3)           | 69 (11.2)          |
| Menthol                          | 469 (29.1)             | 179 (25.7)         | 218 (26.4)         | 234 (21.4)                 | 113 (20.7)         | 152 (24.6)         | 154 (14.1)                                  | 66 (12.1)          | 103 (16.7)         |
| Wintergreen                      | 298 (18.5)             | 141 (20.3)         | 157 (19.0)         | 145 (13.3)                 | 98 (17.9)          | 98 (15.9)          | 57 (5.2)                                    | 46 (8.4)           | 48 (7.8)           |
| Ice                              | 400 (24.8)             | 137 (19.7)         | 125 (15.1)         | 172 (15.8)                 | 96 (17.6)          | 89 (14.4)          | 77 (7.1)                                    | 53 (9.7)           | 43 (7.0)           |
| Coffee                           | 273 (16.9)             | 166 (23.9)         | 189 (22.9)         | 171 (15.7)                 | 116 (21.2)         | 137 (22.2)         | 99 (9.1)                                    | 63 (11.5)          | 85 (13.8)          |
| Flowers                          | 241 (14.9)             | 161 (23.1)         | 168 (20.3)         | 160 (14.7)                 | 113 (20.7)         | 119 (19.3)         | 83 (7.6)                                    | 65 (11.9)          | 69 (11.2)          |
| Essential oils                   | 210 (13.0)             | 117 (16.8)         | 124 (15.0)         | 129 (11.8)                 | 103 (18.9)         | 96 (15.5)          | 58 (5.3)                                    | 59 (10.8)          | 50 (8.1)           |
| Alcohol                          | 270 (16.7)             | 162 (23.3)         | 164 (19.8)         | 180 (16.5)                 | 142 (26.0)         | 134 (21.7)         | 100 (9.2)                                   | 89 (16.3)          | 88 (14.2)          |
| Other Beverage                   | 249 (15.4)             | 132 (19.0)         | 127 (15.4)         | 140 (12.8)                 | 77 (14.1)          | 90 (14.6)          | 65 (6.0)                                    | 40 (7.3)           | 46 (7.4)           |
| Unflavored                       | 175 (10.8)             | 100 (14.4)         | 109 (13.2)         | 95 (8.7)                   | 76 (13.9)          | 80 (12.9)          | 32 (2.9)                                    | 26 (4.8)           | 35 (5.7)           |
| Spice                            | 199 (12.3)             | 101 (14.5)         | 126 (15.2)         | 121 (11.1)                 | 83 (15.2)          | 90 (14.6)          | 62 (5.7)                                    | 44 (8.1)           | 53 (8.6)           |
| Other plant extract              | 182 (11.3)             | 101 (14.5)         | 98 (11.9)          | 131 (12.0)                 | 98 (17.9)          | 93 (15.0)          | 65 (6.0)                                    | 49 (9.0)           | 47 (7.6)           |
| Tea                              | 122 (7.6)              | 55 (7.9)           | 89 (10.8)          | 72 (6.6)                   | 48 (8.8)           | 72 (11.7)          | 29 (2.7)                                    | 25 (4.6)           | 41 (6.6)           |
| Tobacco                          | 289 (17.9)             | 117 (16.8)         | 184 (22.2)         | 121 (11.1)                 | 90 (16.5)          | 136 (22.0)         | 52 (4.8)                                    | 45 (8.2)           | 85 (13.8)          |
| Don't know/remember              | 265 (16.4)             | 91 (13.1)          | 103 (12.5)         | 161 (14.7)                 | 63 (11.5)          | 61 (9.9)           | 135 (12.4)                                  | 47 (8.6)           | 47 (7.6)           |
| Other                            | 66 (4.1)               | 32 (4.6)           | 26 (3.1)           | 63 (5.8)                   | 36 (6.6)           | 34 (5.5)           | 11 (1.0)                                    | 7 (1.3)            | 5 (0.8)            |

Note. All flavor types reported (not mutually exclusive categories of use); a. 'sweet/dessert/candy' flavor types show any use of sweet, dessert, or candy flavors; b. 'Mint/menthol' flavor type shows any use of mint, wintergreen, menthol, or ice flavors. Bold indicates flavors used most often within each age category.

**Table S2.** Past 30-day disposable e-cigarette brands used among past 30-day users of disposable e-cigarette devices, no. (%).

| Disposable e-cigarette brand | Total Sample | Age Category |            |            | p-Value |
|------------------------------|--------------|--------------|------------|------------|---------|
|                              |              | 13-20        | 21-24      | 25-40      |         |
| Puffbar                      | 437 (30.2)   | 201 (26.3)   | 107 (32.1) | 129 (37.0) | <0.001  |
| PuffPlus                     | 357 (25.1)   | 158 (21.2)   | 95 (28.7)  | 104 (30.0) | <0.01   |
| VGOD Stig                    | 187 (13.0)   | 61 (8.1)     | 40 (12.1)  | 86 (24.7)  | <0.001  |
| Posh                         | 238 (16.5)   | 90 (11.9)    | 63 (18.8)  | 85 (25.4)  | <0.001  |
| Mojo                         | 196 (13.7)   | 70 (9.3)     | 48 (14.3)  | 78 (22.7)  | <0.001  |
| Fogg                         | 231 (16.1)   | 90 (11.9)    | 62 (18.6)  | 79 (22.9)  | <0.001  |
| Unicorn                      | 176 (12.3)   | 61 (8.1)     | 44 (13.2)  | 71 (20.6)  | <0.001  |
| Halo                         | 199 (9.6)    | 75 (6.5)     | 50 (10.8)  | 74 (16.4)  | <0.001  |
| Myle                         | 186 (13.0)   | 62 (8.2)     | 45 (13.4)  | 79 (22.8)  | <0.001  |
| Dinner Lady Vape Pen Max     | 182 (12.8)   | 64 (8.6)     | 45 (13.4)  | 73 (21.2)  | <0.001  |
| Cali Barr                    | 229 (15.9)   | 86 (11.4)    | 60 (17.9)  | 83 (23.8)  | <0.001  |
| Hyppe Bar                    | 251 (17.5)   | 107 (14.2)   | 71 (21.2)  | 73 (21.0)  | <0.01   |
| SWFT                         | 190 (13.2)   | 73 (9.7)     | 50 (14.9)  | 67 (19.2)  | <0.001  |
| DJI                          | 183 (12.8)   | 60 (8.0)     | 50 (15.0)  | 73 (21.0)  | <0.001  |
| Flum                         | 218 (15.2)   | 76 (10.1)    | 64 (19.1)  | 78 (22.5)  | <0.001  |

Note. Percentages calculated out of all available responses. Missing data accounted for between 4% and 5% of each response and were omitted. Brand responses are not mutually exclusive. P-values (<0.05) indicate statistically significant trends in proportions across three age categories.

**Table S3.** Past 30-day pod/cartridge-based e-cigarette brands used among past 30-day users of pod/cartridge-based e-cigarette devices, no. (%).

|                                       | Total Sample | Age Category |            |            | <i>p</i> -Value |
|---------------------------------------|--------------|--------------|------------|------------|-----------------|
|                                       |              | 13-20        | 21-24      | 25-40      |                 |
| Pod/cartridge-based e-cigarette brand |              |              |            |            |                 |
| JUUL                                  | 435 (32.6)   | 157 (26.3)   | 116 (34.3) | 162 (40.7) | <0.001          |
| Phix                                  | 179 (13.5)   | 56 (9.4)     | 50 (14.7)  | 73 (18.6)  | <0.001          |
| Smok                                  | 287 (21.7)   | 125 (20.9)   | 60 (18.0)  | 102 (25.9) | 0.100           |
| Logic                                 | 195 (14.7)   | 58 (9.8)     | 58 (17.1)  | 79 (20.2)  | <0.001          |
| Suorin                                | 235 (16.9)   | 76 (12.8)    | 62 (18.1)  | 87 (22.8)  | <0.001          |
| Stiizy                                | 206 (15.5)   | 67 (11.3)    | 49 (14.4)  | 90 (22.9)  | <0.001          |
| Blu                                   | 257 (19.3)   | 80 (13.4)    | 67 (19.8)  | 110 (27.6) | <0.001          |
| VUSE                                  | 366 (27.5)   | 167 (28.0)   | 96 (28.2)  | 103 (26.3) | 0.585           |
| NJoy                                  | 240 (18.1)   | 80 (13.4)    | 59 (17.4)  | 101 (25.7) | <0.001          |
| Aspire                                | 192 (14.4)   | 59 (10.0)    | 51 (15.0)  | 82 (20.6)  | <0.001          |
| Ijoy                                  | 194 (14.6)   | 60 (10.1)    | 58 (17.0)  | 76 (19.2)  | <0.001          |
| Xpod                                  | 195 (14.6)   | 66 (11.0)    | 54 (15.8)  | 75 (18.8)  | <0.001          |
| Apollo Brez                           | 173 (13.1)   | 55 (9.3)     | 46 (13.4)  | 72 (18.4)  | <0.001          |
| VOOPOO                                | 201 (6.3)    | 63 (10.6)    | 62 (18.2)  | 76 (19.2)  | <0.001          |
| Uwell                                 | 200 (15.0)   | 66 (11.1)    | 53 (15.5)  | 81 (20.6)  | <0.001          |
| Geek Vape                             | 175 (13.2)   | 59 (9.9)     | 50 (14.7)  | 66 (16.9)  | <0.001          |
| Vaporesso                             | 227 (17.1)   | 68 (11.5)    | 65 (19.0)  | 94 (24.0)  | <0.001          |
| Lost Vape                             | 189 (14.3)   | 58 (9.8)     | 48 (14.1)  | 83 (21.1)  | <0.001          |
| Inokin                                | 189 (14.3)   | 61 (10.2)    | 58 (17.3)  | 70 (17.8)  | <0.001          |
| Hyde                                  | 313 (23.5)   | 158 (26.5)   | 65 (19.1)  | 90 (22.8)  | 0.118           |

Note. Percentages calculated out of all available responses. Missing data accounted for between 6% and 7% of each response and were omitted. Brand responses are not mutually exclusive. P-values (<0.05) indicate statistically significant trends in proportions across three age categories.

**Table S4.** Ever, past 30-, and past 7-day e-cigarette use by gender, age category, and device type, no. (%).

|                        | 13-20             |            | 21-24      |                   | 25-40      |                   |
|------------------------|-------------------|------------|------------|-------------------|------------|-------------------|
|                        | Female            | Male       | Female     | Male              | Female     | Male              |
| <b>Ever Use</b>        |                   |            |            |                   |            |                   |
| Any E-cigarette        | <b>947 (48.6)</b> | 553 (38.8) | 452 (67.7) | 210 (66.7)        | 463 (55.9) | <b>359 (61.7)</b> |
| Disposables            | <b>737 (38.1)</b> | 402 (28.4) | 327 (49.4) | 137 (43.9)        | 309 (37.6) | 232 (40.2)        |
| Pod/cartridge-based    | <b>709 (36.7)</b> | 414 (29.2) | 337 (51.1) | 162 (51.6)        | 335 (41.0) | <b>275 (47.8)</b> |
| Other E-cigarettes     | <b>528 (27.3)</b> | 328 (23.3) | 283 (42.7) | 129 (41.7)        | 291 (35.7) | 226 (39.6)        |
| <b>Past 30-Day Use</b> |                   |            |            |                   |            |                   |
| Any E-cigarette        | <b>628 (32.2)</b> | 388 (27.2) | 358 (53.6) | 161 (51.1)        | 330 (39.8) | <b>285 (49.0)</b> |
| Disposables            | <b>456 (23.6)</b> | 282 (19.9) | 232 (35.0) | 100 (32.1)        | 193 (23.5) | <b>174 (30.2)</b> |
| Pod/cartridge-based    | <b>372 (19.3)</b> | 228 (16.1) | 225 (34.1) | 116 (36.9)        | 215 (26.3) | <b>201 (35.0)</b> |
| Other e-cigarettes     | 274 (14.2)        | 172 (12.2) | 181 (27.3) | 94 (30.4)         | 188 (23.0) | <b>167 (29.2)</b> |
| <b>Past 7 Day Use</b>  |                   |            |            |                   |            |                   |
| Any E-cigarette        | <b>518 (26.6)</b> | 326 (22.9) | 229 (34.3) | <b>138 (43.8)</b> | 273 (32.9) | <b>245 (42.1)</b> |
| Disposables            | <b>358 (18.5)</b> | 223 (15.7) | 186 (28.1) | 84 (26.9)         | 145 (17.7) | <b>142 (24.6)</b> |
| Pod/cartridge-based    | 283 (14.6)        | 178 (12.6) | 168 (25.5) | 93 (29.6)         | 169 (20.7) | <b>165 (28.7)</b> |
| Other e-cigarettes     | 192 (9.9)         | 140 (10.0) | 141 (21.3) | 72 (23.3)         | 139 (17.0) | <b>133 (23.3)</b> |

Note. Bolded cells indicate statistically significant differences in proportions between males and females within each age category at  $p < 0.05$ .
